# Supplementary material
Source: publisher site journal article supplement (https://cdn.jamanetwork.com/ama/content_public/journal/jama/938413/joi190156supp1_prod.pdf)
Supplement: Supplementary file 1 [file joi190156supp1_prod.pdf]

## Supplementary Online Content

Lee RY, Brumback LC, Sathitratanaheewin S, et al. Association of Physician Orders for Life-Sustaining Treatment with ICU admission among patients hospitalized near the end of life. *JAMA*. doi:10.1001/jama.2019.22523

**eFigure 1.** Washington State POLST Form (February 2011 revision).

**eFigure 2.** Associations Between POLST Order for Medical Interventions and Individual Life-Sustaining Treatments Near the End of Life.

**eFigure 3.** Incidence of POLST-Discordant Intensive Care by Year of Death.

**eFigure 4.** Associations Between POLST Order for Medical Interventions and Intensive Care Near the End of Life Among Patients who Died During the Study Hospitalization.

**eFigure 5.** Associations Between Patient Characteristics and POLST-Discordant Intensive Care Among Patients who Died During the Study Hospitalization.

**eTable 1.** Summary of Missing Covariates by POLST Order for Medical Interventions.

**eTable 2.** Hospital Admissions Among POLST Users Near the End of Life.

This supplementary material was provided by the authors to give readers additional information about their work.

eFigure 1. Washington State POLST Form (February 2011 revision).

| HIPAA PERMITS DISCLOSURE OF POLST TO OTHER HEALTH CARE PROVIDERS AS NECESSARY                                                                                                                                                                                                                                                         |                                                                                                                                                                                                                                                                                                                                                                                                                                                                                                                                                                                                                                                                                                                                                                                                                                                                                                                                                                                                                                                                                                                 |                                                                                                                                                                                                                                                                                                                                                                                                            |  |
|---------------------------------------------------------------------------------------------------------------------------------------------------------------------------------------------------------------------------------------------------------------------------------------------------------------------------------------|-----------------------------------------------------------------------------------------------------------------------------------------------------------------------------------------------------------------------------------------------------------------------------------------------------------------------------------------------------------------------------------------------------------------------------------------------------------------------------------------------------------------------------------------------------------------------------------------------------------------------------------------------------------------------------------------------------------------------------------------------------------------------------------------------------------------------------------------------------------------------------------------------------------------------------------------------------------------------------------------------------------------------------------------------------------------------------------------------------------------|------------------------------------------------------------------------------------------------------------------------------------------------------------------------------------------------------------------------------------------------------------------------------------------------------------------------------------------------------------------------------------------------------------|--|
| <b>Physician Orders for Life-Sustaining Treatment</b>                                                                                                                                                                                                                                                                                 |                                                                                                                                                                                                                                                                                                                                                                                                                                                                                                                                                                                                                                                                                                                                                                                                                                                                                                                                                                                                                                                                                                                 |                                                                                                                                                                                                                                                                                                                                                                                                            |  |
| Last Name - First Name - Middle Initial                                                                                                                                                                                                                                                                                               |                                                                                                                                                                                                                                                                                                                                                                                                                                                                                                                                                                                                                                                                                                                                                                                                                                                                                                                                                                                                                                                                                                                 | <b>FIRST</b> follow these orders, <b>THEN</b> contact physician, nurse practitioner or PA-C. The POLST is a set of medical orders intended to guide emergency medical treatment for persons with advanced life limiting illness based on their current medical condition and goals. Any section not completed implies full treatment for that section. Everyone shall be treated with dignity and respect. |  |
| Date of Birth                                                                                                                                                                                                                                                                                                                         | Last 4 #SSN                                                                                                                                                                                                                                                                                                                                                                                                                                                                                                                                                                                                                                                                                                                                                                                                                                                                                                                                                                                                                                                                                                     |                                                                                                                                                                                                                                                                                                                                                                                                            |  |
| Medical Conditions/Patient Goals:                                                                                                                                                                                                                                                                                                     |                                                                                                                                                                                                                                                                                                                                                                                                                                                                                                                                                                                                                                                                                                                                                                                                                                                                                                                                                                                                                                                                                                                 | Agency Info/Sticker                                                                                                                                                                                                                                                                                                                                                                                        |  |
| <b>A</b><br>Check One<br><input type="checkbox"/> CPR/Attempt Resuscitation <input type="checkbox"/> DNAR/Do Not Attempt Resuscitation (Allow Natural Death)<br><b>Choosing DNAR will include appropriate comfort measures and may still include the range of treatments below. When not in cardiopulmonary arrest, go to part B.</b> | <b>CARDIOPULMONARY RESUSCITATION (CPR):</b> Person has no pulse and is not breathing.                                                                                                                                                                                                                                                                                                                                                                                                                                                                                                                                                                                                                                                                                                                                                                                                                                                                                                                                                                                                                           |                                                                                                                                                                                                                                                                                                                                                                                                            |  |
|                                                                                                                                                                                                                                                                                                                                       | <b>B</b><br>Check One<br><input type="checkbox"/> <b>COMFORT MEASURES ONLY</b> Use medication by any route, positioning, wound care and other measures to relieve pain and suffering. Use oxygen, oral suction and manual treatment of airway obstruction as needed for comfort. <b>Patient prefers no hospital transfer: EMS contact medical control to determine if transport indicated to provide adequate comfort.</b><br><br><input type="checkbox"/> <b>LIMITED ADDITIONAL INTERVENTIONS</b> Includes care described above. Use medical treatment, IV fluids and cardiac monitor as indicated. Do not use intubation or mechanical ventilation. May use less invasive airway support (e.g. CPAP, BiPAP). <b>Transfer to hospital if indicated. Avoid intensive care if possible.</b><br><br><input type="checkbox"/> <b>FULL TREATMENT</b> Includes care described above. Use intubation, advanced airway interventions, mechanical ventilation, and cardioversion as indicated. <b>Transfer to hospital if indicated. Includes intensive care.</b><br><br>Additional Orders: (e.g. dialysis, etc.) _____ |                                                                                                                                                                                                                                                                                                                                                                                                            |  |
| <b>C</b><br><b>SIGNATURES:</b> The signatures below verify that these orders are consistent with the patient's medical condition, known preferences and best known information. If signed by a surrogate, the patient must be <b>decisionally incapacitated and the person signing is the legal surrogate.</b>                        |                                                                                                                                                                                                                                                                                                                                                                                                                                                                                                                                                                                                                                                                                                                                                                                                                                                                                                                                                                                                                                                                                                                 |                                                                                                                                                                                                                                                                                                                                                                                                            |  |
| Discussed with:<br><input type="checkbox"/> Patient <input type="checkbox"/> Parent of Minor<br><input type="checkbox"/> Legal Guardian <input type="checkbox"/> Health Care Agent (DPOAHC)<br><input type="checkbox"/> Spouse/Other:                                                                                                 |                                                                                                                                                                                                                                                                                                                                                                                                                                                                                                                                                                                                                                                                                                                                                                                                                                                                                                                                                                                                                                                                                                                 | PRINT — Physician/ARNP/PA-C Name    Phone Number<br><br><input checked="" type="checkbox"/> Physician/ARNP/PA-C Signature ( <b>mandatory</b> )    Date                                                                                                                                                                                                                                                     |  |
| PRINT — Patient or Legal Surrogate Name    Phone Number<br><br><input checked="" type="checkbox"/> Patient or Legal Surrogate Signature ( <b>mandatory</b> )    Date                                                                                                                                                                  |                                                                                                                                                                                                                                                                                                                                                                                                                                                                                                                                                                                                                                                                                                                                                                                                                                                                                                                                                                                                                                                                                                                 |                                                                                                                                                                                                                                                                                                                                                                                                            |  |
| Person has: <input type="checkbox"/> Health Care Directive (living will) <input type="checkbox"/> Living Will Registry <b>Encourage all advance care planning documents to accompany POLST</b><br><input type="checkbox"/> Durable Power of Attorney for Health Care                                                                  |                                                                                                                                                                                                                                                                                                                                                                                                                                                                                                                                                                                                                                                                                                                                                                                                                                                                                                                                                                                                                                                                                                                 |                                                                                                                                                                                                                                                                                                                                                                                                            |  |

Revised 2/2011    Photocopies and FAXes of signed POLST forms are legal and valid. May make copies for records

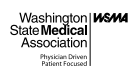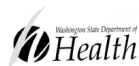

OVER ►

| HIPAA PERMITS DISCLOSURE OF POLST TO OTHER HEALTH CARE PROVIDERS AS NECESSARY                                                                                                                                                                                                                                                                                                                                               |                |                                                                                                                                                                                                                                                                                                                                                                                                                                                                                                |                                                                                                                     |
|-----------------------------------------------------------------------------------------------------------------------------------------------------------------------------------------------------------------------------------------------------------------------------------------------------------------------------------------------------------------------------------------------------------------------------|----------------|------------------------------------------------------------------------------------------------------------------------------------------------------------------------------------------------------------------------------------------------------------------------------------------------------------------------------------------------------------------------------------------------------------------------------------------------------------------------------------------------|---------------------------------------------------------------------------------------------------------------------|
| <b>Other Contact Information (Optional)</b>                                                                                                                                                                                                                                                                                                                                                                                 |                |                                                                                                                                                                                                                                                                                                                                                                                                                                                                                                |                                                                                                                     |
| Name of Guardian, Surrogate or other Contact Person                                                                                                                                                                                                                                                                                                                                                                         | Relationship   | Phone Number                                                                                                                                                                                                                                                                                                                                                                                                                                                                                   |                                                                                                                     |
| Name of Health Care Professional Preparing Form                                                                                                                                                                                                                                                                                                                                                                             | Preparer Title | Phone Number                                                                                                                                                                                                                                                                                                                                                                                                                                                                                   | Date Prepared                                                                                                       |
| <b>D ADDITIONAL PATIENT PREFERENCES (OPTIONAL)</b>                                                                                                                                                                                                                                                                                                                                                                          |                |                                                                                                                                                                                                                                                                                                                                                                                                                                                                                                |                                                                                                                     |
| <b>ANTIBIOTICS:</b>                                                                                                                                                                                                                                                                                                                                                                                                         |                |                                                                                                                                                                                                                                                                                                                                                                                                                                                                                                |                                                                                                                     |
| <input type="checkbox"/> No antibiotics. Use other measures to relieve symptoms. <input type="checkbox"/> Use antibiotics if life can be prolonged.<br><input type="checkbox"/> Determine use or limitation of antibiotics when infection occurs, with comfort as goal.                                                                                                                                                     |                |                                                                                                                                                                                                                                                                                                                                                                                                                                                                                                |                                                                                                                     |
| <b>MEDICALLY ASSISTED NUTRITION:</b>                                                                                                                                                                                                                                                                                                                                                                                        |                |                                                                                                                                                                                                                                                                                                                                                                                                                                                                                                |                                                                                                                     |
| <input type="checkbox"/> Always offer food and liquids by mouth if feasible.                                                                                                                                                                                                                                                                                                                                                |                | <input type="checkbox"/> Trial period of medically assisted nutrition by tube. (Goal: _____ )<br><input type="checkbox"/> No medically assisted nutrition by tube. <input type="checkbox"/> Long-term medically assisted nutrition by tube.                                                                                                                                                                                                                                                    |                                                                                                                     |
| <b>ADDITIONAL ORDERS:</b> (e.g. dialysis, blood products, etc. Attach additional orders if necessary.)                                                                                                                                                                                                                                                                                                                      |                |                                                                                                                                                                                                                                                                                                                                                                                                                                                                                                |                                                                                                                     |
| <input checked="" type="checkbox"/> Physician/ARNP/PA-C Signature                                                                                                                                                                                                                                                                                                                                                           |                |                                                                                                                                                                                                                                                                                                                                                                                                                                                                                                | Date                                                                                                                |
| <b>DIRECTIONS FOR HEALTH CARE PROFESSIONALS</b>                                                                                                                                                                                                                                                                                                                                                                             |                |                                                                                                                                                                                                                                                                                                                                                                                                                                                                                                |                                                                                                                     |
| <b>Completing POLST</b>                                                                                                                                                                                                                                                                                                                                                                                                     |                | <b>Reviewing POLST</b>                                                                                                                                                                                                                                                                                                                                                                                                                                                                         |                                                                                                                     |
| <ul style="list-style-type: none"> <li>Must be completed by health care professional.</li> <li>Should reflect person's current preferences and medical indications. Encourage completion of an advance directive.</li> <li>POLST must be signed by a physician/ARNP/PA-C to be valid. Verbal orders are acceptable with follow-up signature by physician/ARNP/PA-C in accordance with facility/community policy.</li> </ul> |                | including someone with "Comfort Measures Only," should be transferred to a setting able to provide comfort (e.g., treatment of a hip fracture).<br><ul style="list-style-type: none"> <li>An IV medication to enhance comfort may be appropriate for a person who has chosen "Comfort Measures Only."</li> <li>Treatment of dehydration is a measure which may prolong life. A person who desires IV fluids should indicate "Limited Additional Interventions" or "Full Treatment."</li> </ul> |                                                                                                                     |
| <b>Using POLST</b><br>Any incomplete section of POLST implies full treatment for that section.<br>This POLST is effective across all settings including hospitals until replaced by new physician's orders.<br>The health care professional should inquire about other advance directives. In the event of a conflict, the most recently completed form takes precedence.                                                   |                | <b>SECTION D:</b><br><ul style="list-style-type: none"> <li>Oral fluids and nutrition must always be offered if medically feasible.</li> </ul>                                                                                                                                                                                                                                                                                                                                                 |                                                                                                                     |
| <b>SECTION A:</b><br><ul style="list-style-type: none"> <li>No defibrillator should be used on a person who has chosen "Do Not Attempt Resuscitation."</li> </ul>                                                                                                                                                                                                                                                           |                | <b>SECTION B:</b><br><ul style="list-style-type: none"> <li>When comfort cannot be achieved in the current setting, the person,</li> </ul>                                                                                                                                                                                                                                                                                                                                                     |                                                                                                                     |
| <b>Review of this POLST Form</b>                                                                                                                                                                                                                                                                                                                                                                                            |                |                                                                                                                                                                                                                                                                                                                                                                                                                                                                                                |                                                                                                                     |
| Review Date                                                                                                                                                                                                                                                                                                                                                                                                                 | Reviewer       | Location of Review                                                                                                                                                                                                                                                                                                                                                                                                                                                                             | Review Outcome                                                                                                      |
|                                                                                                                                                                                                                                                                                                                                                                                                                             |                |                                                                                                                                                                                                                                                                                                                                                                                                                                                                                                | <input type="checkbox"/> No Change <input type="checkbox"/> Form Voided <input type="checkbox"/> New form completed |
|                                                                                                                                                                                                                                                                                                                                                                                                                             |                |                                                                                                                                                                                                                                                                                                                                                                                                                                                                                                | <input type="checkbox"/> No Change <input type="checkbox"/> Form Voided <input type="checkbox"/> New form completed |

**SEND ORIGINAL FORM WITH PERSON WHENEVER TRANSFERRED OR DISCHARGED**

Photocopies and FAXes of signed POLST forms are legal and valid. May make copies for records

OVER ►

This is the most common version of the Washington State POLST encountered in the study. Minor differences in language are present across the revision history of the Washington State POLST. The most current version is available at <https://wsma.org/POLST/>. Reproduced with permission from the Washington State Medical Association.

**eFigure 2. Associations Between POLST Order for Medical Interventions and Individual Life-Sustaining Treatments Near the End of Life. <sup>a</sup>**

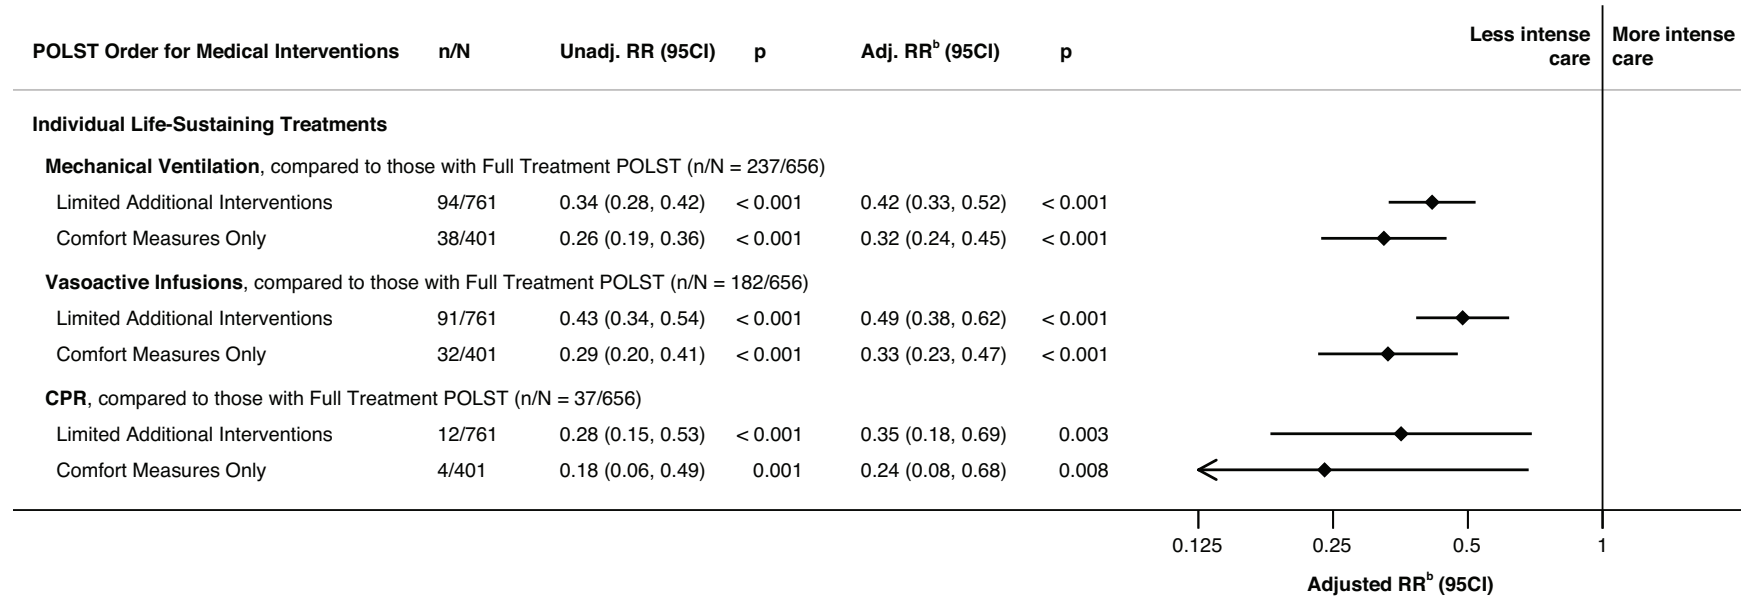

Plot shows estimated adjusted risk ratios and 95%CI. Abbreviations: POLST, Physician Orders for Life-Sustaining Treatment; n/N, unadjusted risk.

<sup>a</sup> Analysis not performed for outcome of new dialysis or continuous renal replacement therapy (CRRT) due to small cell counts.

<sup>b</sup> Adjusted for age at admission, race/ethnicity, education, log-transformed days from POLST completion to study admission, history of cancer with poor prognosis, history of dementia, and whether patient signed own POLST.

**eFigure 3. Incidence of POLST-Discordant Intensive Care by Year of Death.**

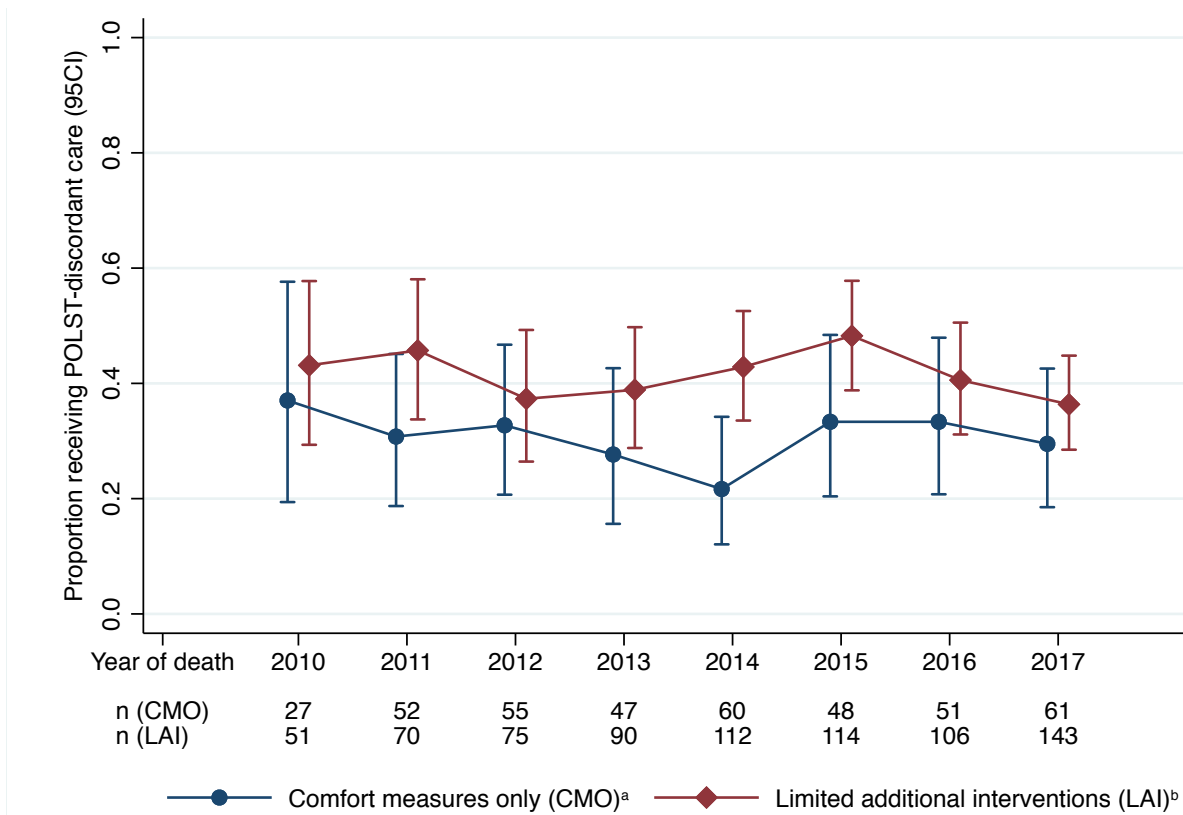

Plot shows estimates and 95%CI of incidence of POLST-discordant care by year of death, separated by POLST order for medical interventions. Abbreviations: POLST, Physician Orders for Life-Sustaining Treatment; CMO, comfort measures only; LAI, limited additional interventions.

Unadjusted and adjusted associations between date of death (modeled as a continuous variable) and POLST-discordant care:

<sup>a</sup> Comfort Only: Unadj. RR 0.99 per year, 95%CI 0.92-1.05, p=0.68; adj. RR<sup>c</sup> 1.01 per year, 95%CI 0.94-1.09, p=0.70.

<sup>b</sup> Limited Interventions: Unadj. RR 0.99 per year, 95%CI 0.95-1.02, p=0.46; adj. RR<sup>c</sup> 1.00 per year, 95%CI 0.96-1.04, p=0.90.

<sup>c</sup> Adjusted for age at admission, race/ethnicity, education, log-transformed days from POLST completion to study admission, history of cancer with poor prognosis, history of dementia, admission for traumatic injury, and whether patient signed own POLST.

**eFigure 4. Associations Between POLST Order for Medical Interventions and Intensive Care Near the End of Life Among Patients who Died During the Study Hospitalization.**

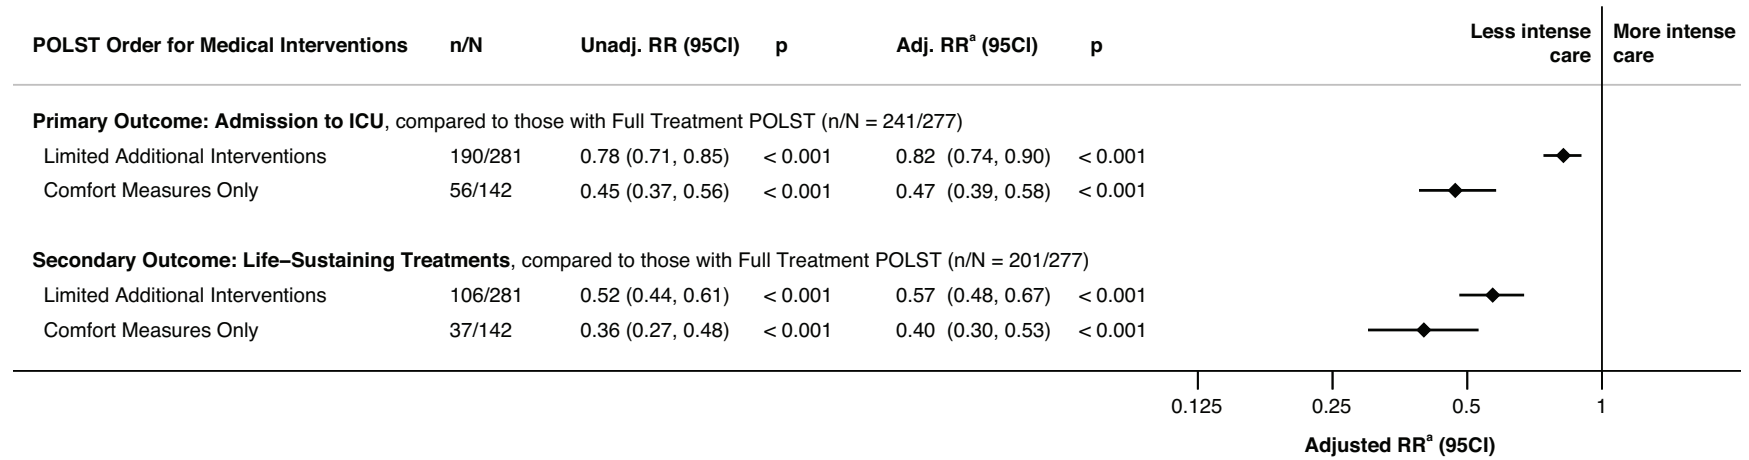

Plot shows estimated adjusted risk ratios and 95%CI. Abbreviations: POLST, Physician Orders for Life-Sustaining Treatment; n/N, unadjusted risk.

<sup>a</sup> Adjusted for age at admission, race/ethnicity, education, log-transformed days from POLST completion to study admission, history of cancer with poor prognosis, history of dementia, and whether patient signed own POLST.

**eFigure 5. Associations Between Patient Characteristics and POLST-Discordant Intensive Care Among Patients who Died During the Study Hospitalization.**

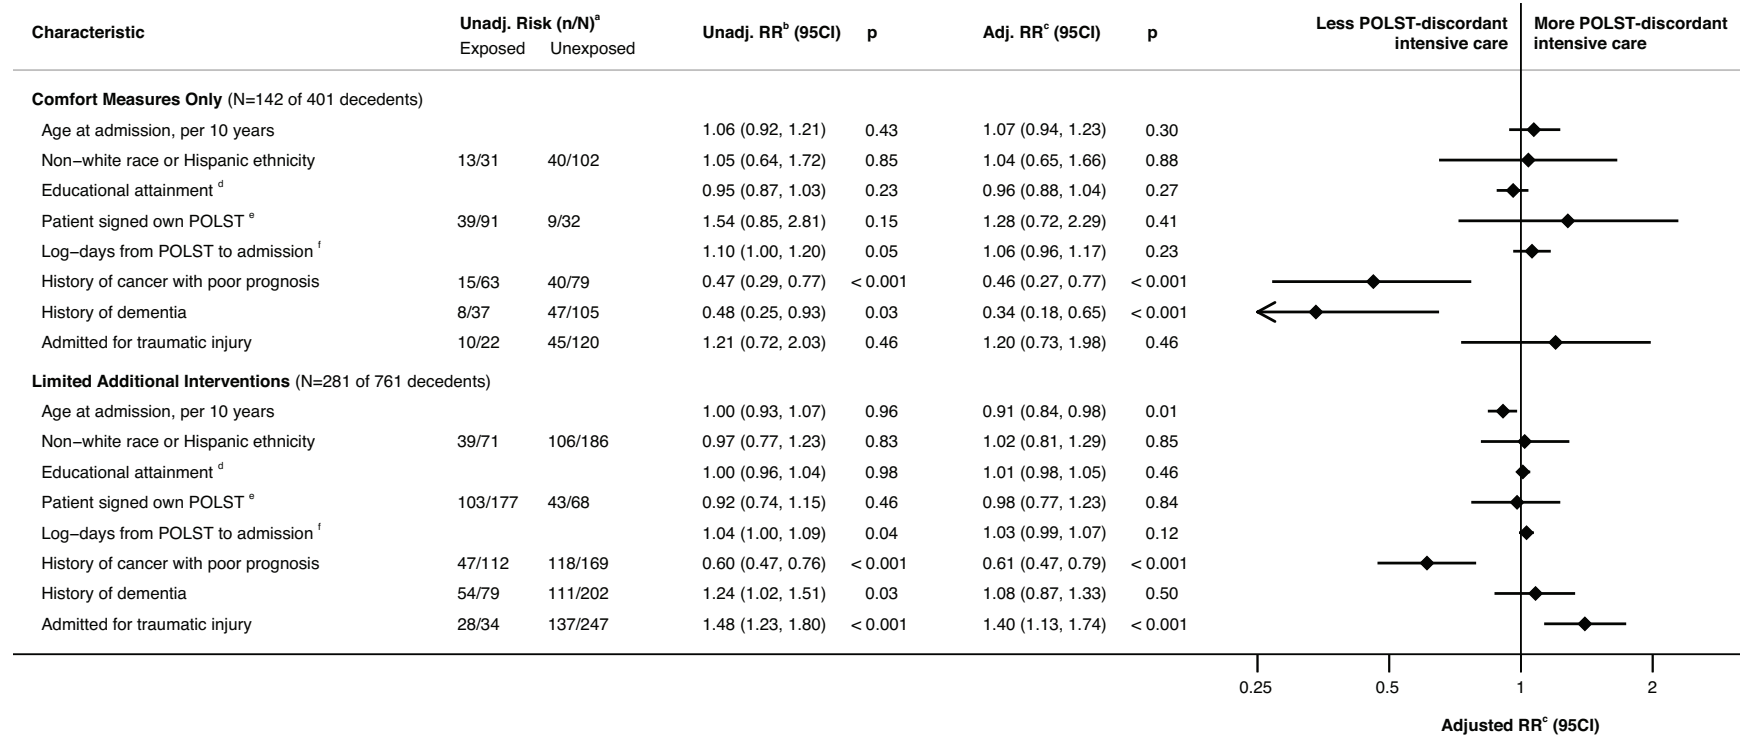

Plot shows estimated adjusted risk ratios and 95%CI. Abbreviations: POLST, Physician Orders for Life-Sustaining Treatment.

<sup>a</sup> Complete cases only. Omitted for continuous exposures.

<sup>b</sup> Unadjusted relative risk with multiple imputation of missing data.

<sup>c</sup> Adjusted for all exposures presented in the figure, separated by POLST order for medical interventions.

<sup>d</sup> Relative risk per year of formal education.

<sup>e</sup> The Washington State POLST specifies that the POLST should always be signed by the patient, unless the patient is “decisionally incapacitated” in which case a legal surrogate may sign the POLST.

<sup>f</sup> Relative risk per doubling of days from POLST signature to date of admission (i.e. log base 2).

**eTable 1. Summary of Missing Covariates by POLST Order for Medical Interventions. <sup>a</sup>**

|                                       | POLST Order for Medical Interventions |                                          |                        |
|---------------------------------------|---------------------------------------|------------------------------------------|------------------------|
|                                       | Comfort Measures Only (n=401)         | Limited Additional Interventions (n=761) | Full Treatment (n=656) |
| <b>Characteristic</b>                 | <i>n complete (%)</i>                 | <i>n complete (%)</i>                    | <i>n complete (%)</i>  |
| Non-white race or Hispanic ethnicity  | 386 (96)                              | 725 (95)                                 | 622 (95)               |
| Educational attainment                | 365 (91)                              | 701 (92)                                 | 591 (90)               |
| Patient signed own POLST <sup>b</sup> | 353 (88)                              | 655 (86)                                 | 549 (84)               |

Abbreviations: POLST, Physician Orders for Life-Sustaining Treatment.

<sup>a</sup> Data for POLST order for medical interventions, age at admission, days from POLST to admission, history of cancer, history of dementia, admitting diagnosis of traumatic injury, ICU admission, and receipt of life-sustaining treatments (mechanical ventilation, vasoactive infusions, new dialysis or CRRT, and CPR) were complete for all patients.

<sup>b</sup> POLSTs with no printed signatory name and an illegible signature were treated as having missing data for POLST signatory.

**eTable 2. Hospital Admissions Among POLST Users Near the End of Life. <sup>a</sup>**

| Characteristic                                              | POLST Order for Medical Interventions |                               |
|-------------------------------------------------------------|---------------------------------------|-------------------------------|
|                                                             | Comfort Measures Only (n=401)         | Limited Interventions (n=761) |
| <b>Characteristics at the Time of Study Hospitalization</b> |                                       |                               |
| Admitted from a nursing facility, n (%) <sup>b</sup>        | 126 (31)                              | 284 (32)                      |
| Primary admitting diagnosis, n (%)                          |                                       |                               |
| Cancer <sup>c</sup>                                         | 100 (25)                              | 181 (24)                      |
| Traumatic injury                                            | 64 (16)                               | 91 (12)                       |
| Pneumonia or respiratory failure <sup>d</sup>               | 51 (13)                               | 94 (12)                       |
| Non-pulmonary sepsis or infection                           | 51 (13)                               | 120 (16)                      |
| Stroke                                                      | 20 (5)                                | 60 (8)                        |
| CHF exacerbation                                            | 14 (3)                                | 52 (7)                        |
| Myocardial infarction                                       | 11 (3)                                | 18 (2)                        |
| COPD exacerbation                                           | 10 (2)                                | 11 (1)                        |
| Decompensated cirrhosis                                     | 9 (2)                                 | 14 (2)                        |
| Renal failure                                               | 7 (2)                                 | 8 (1)                         |
| Gastrointestinal bleeding <sup>e</sup>                      | 4 (1)                                 | 12 (2)                        |
| Other <sup>f</sup>                                          | 60 (15)                               | 100 (13)                      |
| <b>Outcomes Following Study Hospitalization</b>             |                                       |                               |
| Place of death, n (%) <sup>g</sup>                          |                                       |                               |
| Died in study hospital                                      | 142 (37)                              | 281 (38)                      |
| Died in a nursing facility                                  | 124 (32)                              | 210 (28)                      |
| Died at home                                                | 83 (22)                               | 171 (23)                      |
| Died in a hospice facility                                  | 17 (4)                                | 21 (3)                        |
| Died in a non-study hospital, n (%) <sup>h</sup>            | 19 (5)                                | 58 (8)                        |
| Time of death                                               |                                       |                               |
| Died during study hospitalization, n (%)                    | 142 (35)                              | 281 (37)                      |
| Died after discharge from study hospitalization, n (%)      | 259 (65)                              | 480 (63)                      |
| Days from discharge to death, median (IQR) <sup>i</sup>     | 27 (8-71)                             | 28.5 (11-75.5)                |

Abbreviations: POLST, Physician Orders for Life-Sustaining Treatment; CHF, congestive heart failure; COPD, chronic obstructive pulmonary disease.

<sup>a</sup> Data were not abstracted for patients with full-treatment POLSTs.

<sup>b</sup> Includes nursing homes, skilled nursing facilities, acute rehabilitation, and long-term acute care.

<sup>c</sup> Includes organ dysfunction due to cancer or its treatment. Does not include non-structural infectious complications.

<sup>d</sup> Does not include respiratory failure due to CHF, COPD, end-stage renal disease, or end-stage liver disease.

<sup>e</sup> Does not include gastrointestinal bleeding due to cirrhosis or cancer.

<sup>f</sup> Includes all primary admitting diagnoses that could not be grouped into categories of  $\geq 2\%$  prevalence within each stratum.

Examples: unexplained altered mental status, venous thromboembolic disease, limb ischemia, critical metabolic derangements.

<sup>g</sup> Place of death was missing from the death certificate for 16 patients in the comfort-only group, and 20 patients in the limited-interventions group.

<sup>h</sup> Includes individuals who survived the study hospitalization, were subsequently hospitalized at a non-study hospital, and died in the hospital during that hospitalization.

<sup>i</sup> Does not include those who died during the study hospitalization.
